# Supplementary material
Source: HighWire-hosted journal article supplement (https://bmjopenquality.bmj.com/highwire/filestream/136141/field_highwire_adjunct_files/0/ds4943.pdf)
Supplement: ds4943.pdf [file ds4943.pdf]

## Flow chart for initiating and weaning oxygen on patients

1. Identify need for oxygen
2. Prescribe oxygen Recording:  
Target SATs  
Frequency of monitoring SATs  
Ensure starting device meets requirements
3. Measure observations  
Respiratory Rate and SATs
4. If RR and SATs in normal limits reduce by step or stop oxygen if on nasal specs 1l/m  
Record SATs, RR and Subsequent action on Drug Chart
5. Repeat in 15 minutes to ensure SATs remain within limits
6. Return to STEP 3 in 4 hours if still on oxygen
